# Supplementary material for: Facile one-pot synthesis and self-healing properties of tetrazole-based metallopolymers in the presence of iron salts
Source: Royal Society of Chemistry journal article supplement (doi:10.1039/c7ra09621f), 2017-01-01
Supplement: c7ra09621f1.pdf [file c7ra09621f1.pdf]

## Supporting Information

### **Facile One-Pot Synthesis and Self-Healing Properties of Tetrazole-Based Metallopolymers in the Presence of Iron Salt**

**Wenxiang Wang<sup>a</sup>, Mifa Chen<sup>a</sup>, Yuzhong Niu<sup>a</sup>, Qian Tao, Liangjiu Bai<sup>a\*</sup>, Hou Chen<sup>a\*</sup>  
and Zhenping Cheng<sup>b</sup>**

*<sup>a</sup>School of Chemistry and Materials Science, Ludong University, Yantai 264025,  
China. E-mail: bailiangjiu@163.com (L. J. Bai), ldupolymchen@163.com (H. Chen);*

*<sup>b</sup>Jiangsu Key Laboratory of Advanced Functional Polymer Design and Application,  
College of Chemistry, Chemical Engineering and Materials Science, Soochow  
University, Suzhou, 215123, China.*

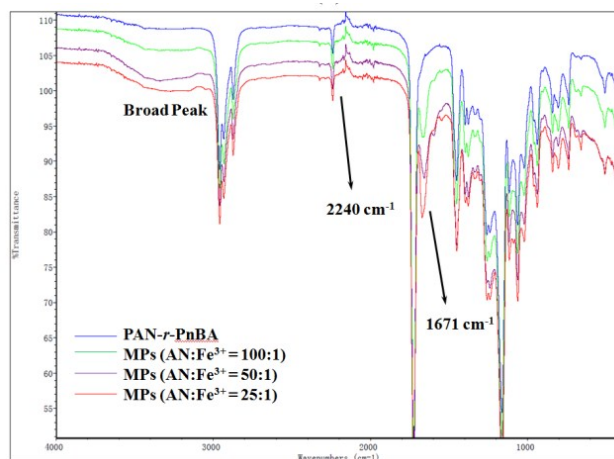

**Figure S1.** IR spectra of the PAN-r-PnBA with the different ratio of MPs.

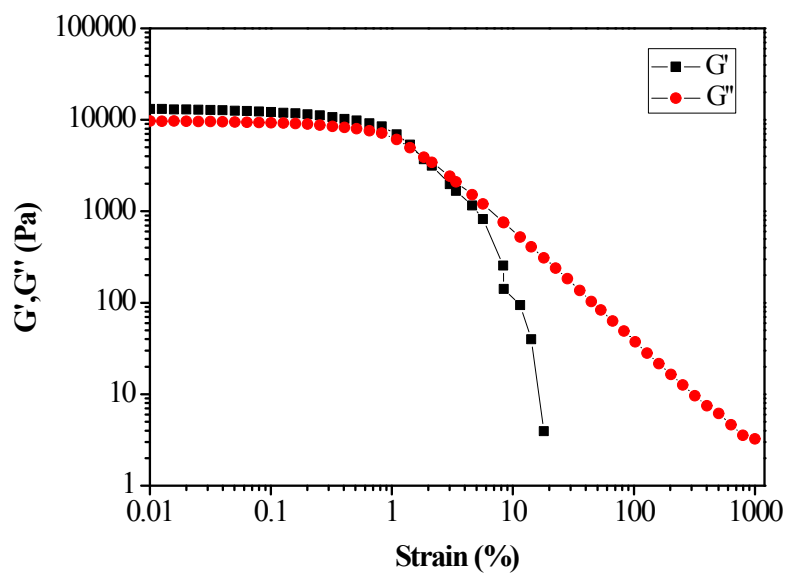

**Figure S2.** Storage modulus ( $G'$ ) and loss modulus ( $G''$ ) values against the strain with PAN-*r*-PnBA during the dynamic strain sweep.

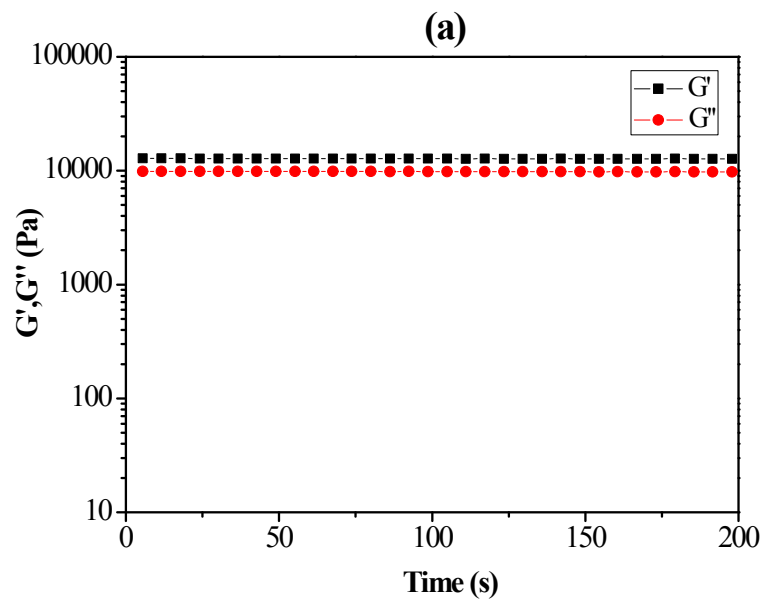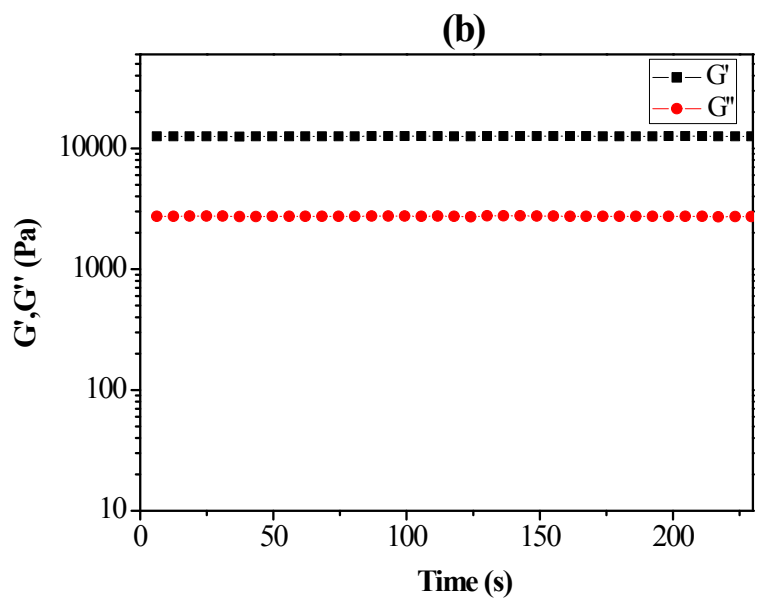

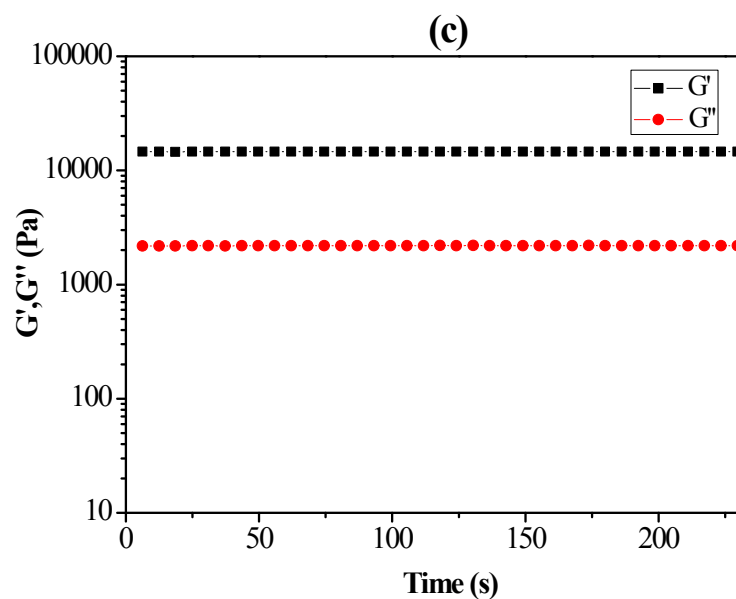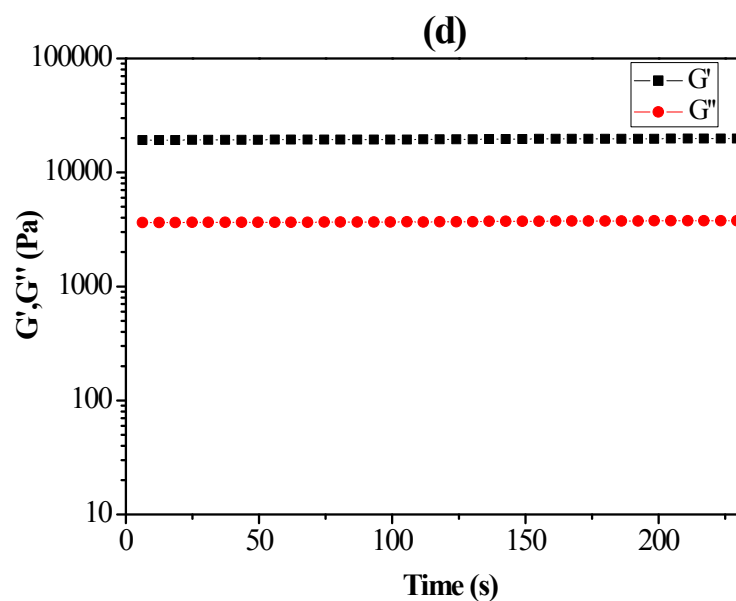

**Figure S3.** Storage modulus ( $G'$ ) and loss modulus ( $G''$ ) values against the strain during the dynamic strain sweep. The values of storage modulus ( $G'$ ) and loss modulus ( $G''$ ) were investigated by an immediate recovery after the 1000 % strain deformation ( $t = 200$  s,  $\gamma = 1$  %), (a) PAN-*r*-PnBA, (b) MPs (AN:Fe<sup>3+</sup> = 75:1), (c) MPs (AN:Fe<sup>3+</sup> = 50:1), (d) MPs (AN:Fe<sup>3+</sup> = 25:1).

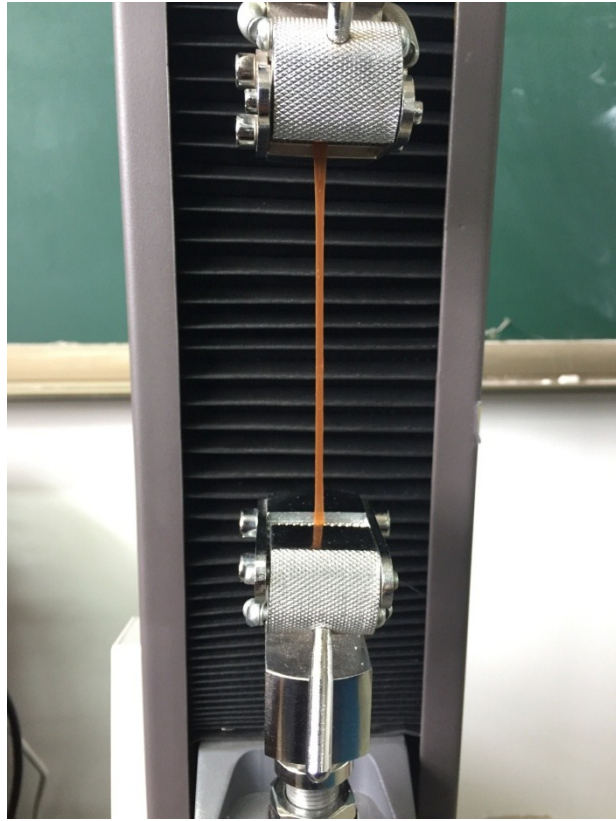

**Figure S4.** The stretch process of self-healing materials.

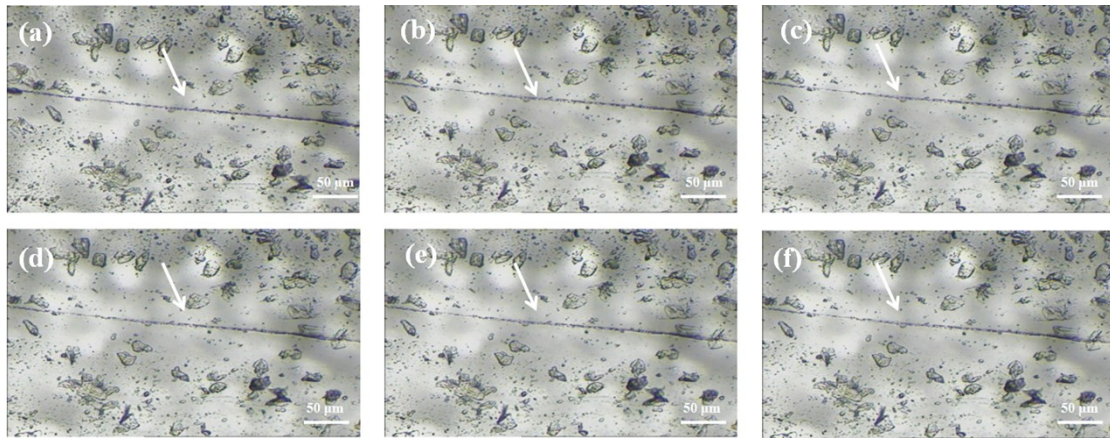

**Figure S5.** Self-healing processes of PAN-*r*-PnBA at ambient temperature (a) 0 min, (b) 10 min, (c) 30 min, (d) 1 hours, (e) 4 hours and (f) 12 hours, respectively.
